# Supplementary material
Source: publisher figshare collection journal article supplement (https://gsajournals.figshare.com/ndownloader/files/18714695)
Supplement: Supplementary file 1 [file 18714695]

## Sheet: Sheet1
1	Gene_id	CN152_24_readcount(CN152_24vsck)	ck_readcount(CN152_24vsck)	log2FoldChange(CN152_24vsck)	pval(CN152_24vsck)	padj(CN152_24vsck)	significant(CN152_24vsck)	CN152_72_readcount(CN152_72vsCN152_24)	CN152_24_readcount(CN152_72vsCN152_24)	log2FoldChange(CN152_72vsCN152_24)	pval(CN152_72vsCN152_24)	padj(CN152_72vsCN152_24)	significant(CN152_72vsCN152_24)	CN152_72_readcount(CN152_72vsck)	ck_readcount(CN152_72vsck)	log2FoldChange(CN152_72vsck)	pval(CN152_72vsck)	padj(CN152_72vsck)	significant(CN152_72vsck)	biological_process	biological_process_description	cellular_component	cellular_component_description	molecular_function	molecular_function_description	KEGG AnnotInfo	KEGG url	Gene name	Interpro Description
2	Novel00394	32.5391	3.08091	3.4007	0.0096695	0.046105	UP	150.637	31.4046	2.262	0.00091032	0.010171	UP	158.652	3.2558	5.6067	1.4287e-09	9.9375e-08	UP	GO:0008152//GO:0008150	metabolic process//biological_process	--	--	GO:0010333//GO:0005488//GO:0016835//GO:0046872//GO:0016838//GO:0043169//GO:0046914//GO:0003723//GO:0000287//GO:0016829//GO:0008270//GO:0043167//GO:0003674//GO:0003824//GO:1901363//GO:0003676//GO:0097159	terpene synthase activity//binding//carbon-oxygen lyase activity//metal ion binding//carbon-oxygen lyase activity, acting on phosphates//cation binding//transition metal ion binding//RNA binding//magnesium ion binding//lyase activity//zinc ion binding//ion binding//molecular_function//catalytic activity//heterocyclic compound binding//nucleic acid binding//organic cyclic compound binding	K12742 isoprene synthase [EC:4.2.3.27] | (RefSeq) (-)-camphene/tricyclene synthase, chloroplastic-like	http://www.genome.jp/dbget-bin/www_bget?sot:102591566	--	PREDICTED: (-)-camphene/tricyclene synthase, chloroplastic-like [Solanum tuberosum]
3	Novel03055	759.239	136.677	2.4738	0.00043226	0.0036875	UP	2112.03	734.07	1.5246	3.4454e-06	8.3342e-05	UP	2226.5	143.316	3.9575	1.5898e-27	2.0674e-24	UP	GO:1901360//GO:0006139//GO:0044237//GO:0009059//GO:0043170//GO:0006259//GO:0034641//GO:0009058//GO:0006807//GO:0090304//GO:0046483//GO:0044238//GO:0008152//GO:0044260//GO:1901576//GO:0006725//GO:0071704//GO:0034645//GO:0008150//GO:0044249//GO:0006260//GO:0009987	organic cyclic compound metabolic process//nucleobase-containing compound metabolic process//cellular metabolic process//macromolecule biosynthetic process//macromolecule metabolic process//DNA metabolic process//cellular nitrogen compound metabolic process//biosynthetic process//nitrogen compound metabolic process//nucleic acid metabolic process//heterocycle metabolic process//primary metabolic …	--	--	GO:0005488//GO:0003677//GO:0003674//GO:1901363//GO:0003676//GO:0097159	binding//DNA binding//molecular_function//heterocyclic compound binding//nucleic acid binding//organic cyclic compound binding	--	--	--	--
4	PGSC0003DMG400000691	121.293	14.602	3.0543	9.3823e-07	1.7809e-05	UP	317.572	117.44	1.4352	0.0010707	0.011647	UP	334.769	15.2826	4.4532	5.8504e-13	8.5355e-11	UP	GO:0055085//GO:0008150//GO:0006810//GO:0051234//GO:0009987//GO:0051179	transmembrane transport//biological_process//transport//establishment of localization//cellular process//localization	GO:0044425//GO:0016020//GO:0005575//GO:0016021//GO:0031224	membrane part//membrane//cellular_component//integral component of membrane//intrinsic component of membrane	GO:0003674//GO:0005215	molecular_function//transporter activity	K14611 solute carrier family 23 (nucleobase transporter), member 1/2 | (RefSeq) nucleobase-ascorbate transporter 1	http://www.genome.jp/dbget-bin/www_bget?sot:102605796	-	Nucleobase-ascorbate transporter 1||Xanthine/uracil/vitamin C permease
5	PGSC0003DMG400001015	148.221	0	Inf	1.2254e-24	2.6833e-22	UP	468.87	143.508	1.7081	0.00015251	0.0022606	UP	494.479	0	Inf	2.185e-26	2.2535e-23	UP	GO:0006796//GO:0016311//GO:0009987//GO:0008150//GO:0006793//GO:0044237//GO:0008152	phosphate-containing compound metabolic process//dephosphorylation//cellular process//biological_process//phosphorus metabolic process//cellular metabolic process//metabolic process	--	--	GO:0016788//GO:0003824//GO:0042578//GO:0016791//GO:0003674//GO:0016787	hydrolase activity, acting on ester bonds//catalytic activity//phosphoric ester hydrolase activity//phosphatase activity//molecular_function//hydrolase activity	K13248 pyridoxal phosphate phosphatase PHOSPHO2 [EC:3.1.3.74] | (RefSeq) inorganic pyrophosphatase 1-like	http://www.genome.jp/dbget-bin/www_bget?sot:102585181	-	Phosphatase PHOSPHO-type||HAD-like domain
6	PGSC0003DMG400002699	314.308	130.716	1.2657	0.0070638	0.036121	UP	963.071	304.41	1.6616	4.077e-05	0.00073729	UP	1017.13	137.042	2.8918	1.2319e-08	6.9647e-07	UP	--	--	--	--	--	--	no KO assigned | (RefSeq) F-box protein At5g62510-like	http://www.genome.jp/dbget-bin/www_bget?sot:102586977	-	F-box domain||F-box associated interaction domain
7	PGSC0003DMG400004082	110.827	32.7118	1.7604	0.00096693	0.0072207	UP	349.821	107.405	1.7036	0.00045212	0.0056677	UP	368.548	34.2208	3.4289	1.8235e-08	9.8626e-07	UP	GO:0051252//GO:0008152//GO:0044237//GO:0006139//GO:1901360//GO:1903506//GO:0044271//GO:0019222//GO:0006725//GO:0043170//GO:0006351//GO:0034645//GO:0071704//GO:0097659//GO:0019219//GO:0009059//GO:2001141//GO:1901576//GO:0044260//GO:0034654//GO:0019438//GO:0010556//GO:0060255//GO:0018130//GO:0050794//GO:0006355//GO:0031326//GO:0008150//GO:0065007//GO:0010468//GO:2000112//GO:0032774//GO:0009889//GO:…	regulation of RNA metabolic process//metabolic process//cellular metabolic process//nucleobase-containing compound metabolic process//organic cyclic compound metabolic process//regulation of nucleic acid-templated transcription//cellular nitrogen compound biosynthetic process//regulation of metabolic process//cellular aromatic compound metabolic process//macromolecule metabolic process//transcrip…	GO:0044424//GO:0043227//GO:0005575//GO:0043231//GO:0043229//GO:0005623//GO:0044464//GO:0043226//GO:0005622//GO:0005634	intracellular part//membrane-bounded organelle//cellular_component//intracellular membrane-bounded organelle//intracellular organelle//cell//cell part//organelle//intracellular//nucleus	GO:0005488//GO:0003674//GO:0003676//GO:0003677//GO:1901363//GO:0097159	binding//molecular_function//nucleic acid binding//DNA binding//heterocyclic compound binding//organic cyclic compound binding	no KO assigned | (RefSeq) transcription factor TCP5-like	http://www.genome.jp/dbget-bin/www_bget?sot:102604765	-	Transcription factor, TCP||Transcription factor TCP subgroup
8	PGSC0003DMG400005335	3152.27	800.579	1.9773	8.0495e-10	2.7907e-08	UP	7224.6	3049.4	1.2444	0.004264	0.035403	UP	7609.27	838.918	3.1812	4.8109e-08	2.3133e-06	UP	GO:0042592//GO:0008152//GO:0065008//GO:0050789//GO:0065007//GO:0008150//GO:0050794//GO:0055114//GO:0019725//GO:0045454//GO:0009987	homeostatic process//metabolic process//regulation of biological quality//regulation of biological process//biological regulation//biological_process//regulation of cellular process//oxidation-reduction process//cellular homeostasis//cell redox homeostasis//cellular process	GO:0044425//GO:0016021//GO:0005575//GO:0016020//GO:0005623//GO:0031224	membrane part//integral component of membrane//cellular_component//membrane//cell//intrinsic component of membrane	GO:0009055//GO:0016667//GO:0003674//GO:0015036//GO:0015035//GO:0016491//GO:0003824	electron transfer activity//oxidoreductase activity, acting on a sulfur group of donors//molecular_function//disulfide oxidoreductase activity//protein disulfide oxidoreductase activity//oxidoreductase activity//catalytic activity	K03676 glutaredoxin 3 | (RefSeq) GRX1; glutaredoxin	http://www.genome.jp/dbget-bin/www_bget?sot:102577494	-	Thioredoxin-like fold||Glutaredoxin-like, plant II||Glutaredoxin||P-loop containing nucleoside triphosphate hydrolase||Glutaredoxin subgroup
9	PGSC0003DMG400010471	98.6958	19.3882	2.3478	3.8883e-05	0.00047244	UP	240.909	95.5802	1.3337	0.001344	0.013939	UP	254.646	20.3247	3.6472	3.6046e-14	6.2319e-12	UP	GO:0019538//GO:0044238//GO:0043170//GO:0008150//GO:0071704//GO:0006508//GO:0008152	protein metabolic process//primary metabolic process//macromolecule metabolic process//biological_process//organic substance metabolic process//proteolysis//metabolic process	--	--	GO:0008233//GO:0070011//GO:0017171//GO:0003824//GO:0003674//GO:0008236//GO:0004175//GO:0016787//GO:0004252	peptidase activity//peptidase activity, acting on L-amino acid peptides//serine hydrolase activity//catalytic activity//molecular_function//serine-type peptidase activity//endopeptidase activity//hydrolase activity//serine-type endopeptidase activity	no KO assigned | (RefSeq) subtilisin-like protease SBT1.7	http://www.genome.jp/dbget-bin/www_bget?sot:102605676	-	Cucumisin-like catalytic domain||Peptidase S8, subtilisin, Ser-active site||Peptidase S8, subtilisin, His-active site||Peptidase S8/S53 domain||Peptidase S8 propeptide/proteinase inhibitor I9||Peptidase S8, subtilisin-related
10	PGSC0003DMG400014776	841.837	177.376	2.2467	0.0019451	0.012796	UP	1745.85	813.207	1.1022	0.00024966	0.0034517	UP	1842.94	187.797	3.2948	1.2647e-30	2.9096e-27	UP	--	--	--	--	GO:0003824//GO:0016740//GO:0016747//GO:0016746//GO:0003674//GO:0008080//GO:0016407//GO:0016410	catalytic activity//transferase activity//transferase activity, transferring acyl groups other than amino-acyl groups//transferase activity, transferring acyl groups//molecular_function//N-acetyltransferase activity//acetyltransferase activity//N-acyltransferase activity	no KO assigned | (RefSeq) tyramine N-feruloyltransferase 4/11-like	http://www.genome.jp/dbget-bin/www_bget?sot:102579407	-	Acyl-CoA N-acyltransferase||GNAT domain
11	PGSC0003DMG400019657	13.1763	0.295844	5.477	0.0064098	0.033507	UP	71.6144	12.7727	2.4872	0.00058936	0.0070549	UP	75.7014	0.307304	7.9445	4.5346e-11	4.4178e-09	UP	GO:0008150//GO:0008152	biological_process//metabolic process	--	--	GO:0016758//GO:0003824//GO:0016740//GO:0003674//GO:0016757	transferase activity, transferring hexosyl groups//catalytic activity//transferase activity//molecular_function//transferase activity, transferring glycosyl groups	no KO assigned | (RefSeq) UDP-glycosyltransferase 89A2-like	http://www.genome.jp/dbget-bin/www_bget?sot:102599059	-	UDP-glucuronosyl/UDP-glucosyltransferase
12	PGSC0003DMG400023004	44.0053	10.0354	2.1326	0.0064955	0.033854	UP	202.812	42.6264	2.2503	3.4519e-06	8.34e-05	UP	213.654	10.5064	4.3459	1.7956e-12	2.3555e-10	UP	GO:0008150//GO:0043412//GO:0006796//GO:0009987//GO:0006793//GO:0008152//GO:0044260//GO:0071704//GO:0044267//GO:0019538//GO:0006468//GO:0044238//GO:0036211//GO:0044237//GO:0006464//GO:0043170//GO:0016310	biological_process//macromolecule modification//phosphate-containing compound metabolic process//cellular process//phosphorus metabolic process//metabolic process//cellular macromolecule metabolic process//organic substance metabolic process//cellular protein metabolic process//protein metabolic process//protein phosphorylation//primary metabolic process//protein modification process//cellular me…	GO:0005575//GO:0016020//GO:0031224//GO:0044425//GO:0016021	cellular_component//membrane//intrinsic component of membrane//membrane part//integral component of membrane	GO:0016740//GO:1901363//GO:0003824//GO:0030554//GO:0097159//GO:0035639//GO:0032555//GO:0032550//GO:0016301//GO:0032553//GO:0005524//GO:0003674//GO:0036094//GO:0043167//GO:0004672//GO:0001882//GO:0016772//GO:0000166//GO:0001883//GO:0016773//GO:0005488//GO:0032549//GO:0032559//GO:0043168//GO:0017076//GO:0097367//GO:1901265	transferase activity//heterocyclic compound binding//catalytic activity//adenyl nucleotide binding//organic cyclic compound binding//purine ribonucleoside triphosphate binding//purine ribonucleotide binding//purine ribonucleoside binding//kinase activity//ribonucleotide binding//ATP binding//molecular_function//small molecule binding//ion binding//protein kinase activity//nucleoside binding//tran…	no KO assigned | (RefSeq) somatic embryogenesis receptor kinase 1	http://www.genome.jp/dbget-bin/www_bget?sot:102581512	-	Protein kinase domain||Leucine-rich repeat-containing N-terminal, plant-type||Leucine-rich repeat||Leucine-rich repeat domain, L domain-like||Serine-threonine/tyrosine-protein kinase, catalytic domain||Protein kinase-like domain
13	PGSC0003DMG400025446	143.576	17.6791	3.0217	0.0013423	0.0094393	UP	346.664	138.661	1.322	0.00055717	0.0067278	UP	366.59	18.6671	4.2956	2.7239e-21	1.4813e-18	UP	--	--	--	--	--	--	--	--	--	--
14	PGSC0003DMG400026189	1260.82	253.917	2.3119	1.0202e-05	0.00014728	UP	3118.17	1219.09	1.3549	0.00031863	0.0042376	UP	3289.29	265.195	3.6327	4.3451e-12	5.3481e-10	UP	GO:0044237//GO:0044042//GO:0010411//GO:0043170//GO:0044085//GO:0071555//GO:0045229//GO:0071840//GO:0071554//GO:0016043//GO:0005976//GO:0006073//GO:0044238//GO:0044036//GO:0008152//GO:0044264//GO:0044260//GO:0005975//GO:0042546//GO:0044262//GO:0071704//GO:0008150//GO:0010383//GO:0010410//GO:0009987	cellular metabolic process//glucan metabolic process//xyloglucan metabolic process//macromolecule metabolic process//cellular component biogenesis//cell wall organization//external encapsulating structure organization//cellular component organization or biogenesis//cell wall organization or biogenesis//cellular component organization//polysaccharide metabolic process//cellular glucan metabolic pr…	GO:0030312//GO:0048046//GO:0005623//GO:0005618//GO:0005576//GO:0044464//GO:0071944//GO:0005575	external encapsulating structure//apoplast//cell//cell wall//extracellular region//cell part//cell periphery//cellular_component	GO:0016798//GO:0016758//GO:0016762//GO:0016787//GO:0004553//GO:0003674//GO:0016757//GO:0016740//GO:0003824	hydrolase activity, acting on glycosyl bonds//transferase activity, transferring hexosyl groups//xyloglucan:xyloglucosyl transferase activity//hydrolase activity//hydrolase activity, hydrolyzing O-glycosyl compounds//molecular_function//transferase activity, transferring glycosyl groups//transferase activity//catalytic activity	K08235 xyloglucan:xyloglucosyl transferase [EC:2.4.1.207] | (RefSeq) xyloglucan endotransglucosylase/hydrolase protein 9	http://www.genome.jp/dbget-bin/www_bget?sot:102603337	XTH9	Xyloglucan endotransglucosylase/hydrolase||Beta-glucanase||Glycoside hydrolase family 16||Concanavalin A-like lectin/glucanase domain||Xyloglucan endo-transglycosylase, C-terminal
15	PGSC0003DMG400026566	68.286	10.1682	2.7475	5.822e-05	0.00067708	UP	177.22	66.1746	1.4212	0.0029885	0.026746	UP	187.568	10.6634	4.1367	7.0952e-09	4.1447e-07	UP	--	--	--	--	--	--	no KO assigned | (RefSeq) protein RALF-like 27	http://www.genome.jp/dbget-bin/www_bget?sot:102600341	--	--
16	PGSC0003DMG400026592	120.537	34.314	1.8126	0.00033693	0.0030051	UP	263.222	116.545	1.1754	0.003618	0.031132	UP	277.881	36.1267	2.9433	2.0934e-11	2.1516e-09	UP	GO:0009059//GO:0019219//GO:0043170//GO:0019222//GO:0044271//GO:1901360//GO:0006139//GO:0044237//GO:0010467//GO:0009058//GO:0006807//GO:0044238//GO:0046483//GO:0090304//GO:0016070//GO:0034641//GO:0032774//GO:0010468//GO:0065007//GO:0050794//GO:0018130//GO:0060255//GO:0010556//GO:0034654//GO:0044260//GO:1901576//GO:2001141//GO:0097659//GO:0071704//GO:0034645//GO:0006351//GO:0006725//GO:1903506//GO:…	macromolecule biosynthetic process//regulation of nucleobase-containing compound metabolic process//macromolecule metabolic process//regulation of metabolic process//cellular nitrogen compound biosynthetic process//organic cyclic compound metabolic process//nucleobase-containing compound metabolic process//cellular metabolic process//gene expression//biosynthetic process//nitrogen compound metabo…	--	--	GO:0046872//GO:0005488//GO:0046914//GO:0043169//GO:0003674//GO:0043167//GO:0008270	metal ion binding//binding//transition metal ion binding//cation binding//molecular_function//ion binding//zinc ion binding	no KO assigned | (RefSeq) uncharacterized LOC102600983	http://www.genome.jp/dbget-bin/www_bget?sot:102600983	-	Zf-FLZ domain||Zinc finger, NHR/GATA-type
17	PGSC0003DMG400028191	70.5417	20.2915	1.7976	0.0033634	0.019898	UP	269.188	68.3322	1.978	4.4076e-06	0.00010398	UP	283.842	21.3012	3.7361	1.289e-15	2.9582e-13	UP	GO:0009987//GO:0008150//GO:0042221//GO:0006810//GO:0051234//GO:0050789//GO:0023052//GO:0009755//GO:0071310//GO:0009733//GO:0051179//GO:0007165//GO:0070887//GO:0065007//GO:0032870//GO:0050794//GO:0050896//GO:0009725//GO:0071495//GO:0010033//GO:0007154//GO:0071365//GO:0009719//GO:0055085//GO:0009734//GO:0051716	cellular process//biological_process//response to chemical//transport//establishment of localization//regulation of biological process//signaling//hormone-mediated signaling pathway//cellular response to organic substance//response to auxin//localization//signal transduction//cellular response to chemical stimulus//biological regulation//cellular response to hormone stimulus//regulation of cellul…	GO:0005575//GO:0016020//GO:0031224//GO:0016021//GO:0044425	cellular_component//membrane//intrinsic component of membrane//integral component of membrane//membrane part	--	--	K13947 auxin efflux carrier family | (RefSeq) probable auxin efflux carrier component 1b	http://www.genome.jp/dbget-bin/www_bget?sot:102588079	-	Auxin efflux carrier, plant type||Membrane transport protein
18	PGSC0003DMG400028479	60.2052	12.4471	2.2741	0.004867	0.026871	UP	146.745	58.2894	1.332	0.0057311	0.044441	UP	155.179	13.1094	3.5653	7.9111e-10	5.9005e-08	UP	GO:0023052//GO:0043412//GO:0050789//GO:0008150//GO:0009987//GO:0006796//GO:0008152//GO:0006793//GO:0071704//GO:0044260//GO:0050896//GO:0044267//GO:0050794//GO:0065007//GO:0006468//GO:0044238//GO:0036211//GO:0007165//GO:0019538//GO:0044237//GO:0051716//GO:0007154//GO:0043170//GO:0016310//GO:0006464	signaling//macromolecule modification//regulation of biological process//biological_process//cellular process//phosphate-containing compound metabolic process//metabolic process//phosphorus metabolic process//organic substance metabolic process//cellular macromolecule metabolic process//response to stimulus//cellular protein metabolic process//regulation of cellular process//biological regulation…	GO:0016020//GO:0005575//GO:0031224//GO:0044425//GO:0016021	membrane//cellular_component//intrinsic component of membrane//membrane part//integral component of membrane	GO:1901363//GO:0030554//GO:0003824//GO:0016740//GO:0097159//GO:0016301//GO:0032553//GO:0005524//GO:0035639//GO:0032555//GO:0032550//GO:0043167//GO:0003674//GO:0036094//GO:0000166//GO:0001883//GO:0004672//GO:0001882//GO:0016772//GO:0004674//GO:0016773//GO:0043168//GO:0005488//GO:0032559//GO:0032549//GO:0097367//GO:1901265//GO:0017076	heterocyclic compound binding//adenyl nucleotide binding//catalytic activity//transferase activity//organic cyclic compound binding//kinase activity//ribonucleotide binding//ATP binding//purine ribonucleoside triphosphate binding//purine ribonucleotide binding//purine ribonucleoside binding//ion binding//molecular_function//small molecule binding//nucleotide binding//purine nucleoside binding//pr…	no KO assigned | (RefSeq) CBL-interacting serine/threonine-protein kinase 20	http://www.genome.jp/dbget-bin/www_bget?sot:102587198	CIPK20	Protein kinase domain||Protein kinase, ATP binding site||Calcium/calmodulin-dependent/calcium-dependent protein kinase||Serine/threonine-protein kinase, active site||NAF domain||NAF/FISL domain||Protein kinase-like domain
19	PGSC0003DMG400029579	27.6921	2.95456	3.2285	0.0025007	0.015675	UP	121.114	26.8139	2.1753	0.00015674	0.0023161	UP	127.624	3.08272	5.3716	4.7603e-13	6.9792e-11	UP	--	--	--	--	GO:0005488//GO:0005515//GO:0003674//GO:0005516	binding//protein binding//molecular_function//calmodulin binding	no KO assigned | (RefSeq) TNF receptor-associated factor family protein DDB_G0272098	http://www.genome.jp/dbget-bin/www_bget?sot:102603197	-	Calmodulin-binding domain, plant
20	PGSC0003DMG400031014	236.059	85.1945	1.4703	0.00039362	0.0034067	UP	463.9	228.553	1.0213	0.0040186	0.033776	UP	489.67	89.4144	2.4532	9.8923e-12	1.1081e-09	UP	--	--	GO:0044424//GO:0043229//GO:0005623//GO:0005622//GO:0044464//GO:0005575//GO:0043231//GO:0043227//GO:0043226	intracellular part//intracellular organelle//cell//intracellular//cell part//cellular_component//intracellular membrane-bounded organelle//membrane-bounded organelle//organelle	GO:0005488//GO:0051540//GO:0051536//GO:0003674//GO:0051537	binding//metal cluster binding//iron-sulfur cluster binding//molecular_function//2 iron, 2 sulfur cluster binding	no KO assigned | (RefSeq) xyloglucan galactosyltransferase KATAMARI1 homolog	http://www.genome.jp/dbget-bin/www_bget?sot:102602496	-	Iron sulphur-containing domain, CDGSH-type
21	PGSC0003DMG400032528	897.771	383.06	1.2288	0.0065893	0.034205	UP	1963.38	868.91	1.1761	8.1839e-05	0.0013332	UP	2073.94	402.67	2.3647	6.1025e-18	1.9213e-15	UP	--	--	GO:0009706//GO:0031969//GO:0044424//GO:0044446//GO:0043229//GO:0044422//GO:0031090//GO:0044435//GO:0009528//GO:0044434//GO:0031967//GO:0019866//GO:0005623//GO:0044444//GO:0005622//GO:0044464//GO:0009941//GO:0009507//GO:0005737//GO:0043231//GO:0009526//GO:0005575//GO:0043227//GO:0016020//GO:0005739//GO:0042170//GO:0009536//GO:0031975//GO:0043226	chloroplast inner membrane//chloroplast membrane//intracellular part//intracellular organelle part//intracellular organelle//organelle part//organelle membrane//plastid part//plastid inner membrane//chloroplast part//organelle envelope//organelle inner membrane//cell//cytoplasmic part//intracellular//cell part//chloroplast envelope//chloroplast//cytoplasm//intracellular membrane-bounded organelle…	--	--	no KO assigned | (RefSeq) protein RETICULATA-RELATED 4, chloroplastic	http://www.genome.jp/dbget-bin/www_bget?sot:102602697	-	Protein RETICULATA-related
22	PGSC0003DMG401017380	2482.65	756.996	1.7135	4.8477e-08	1.2091e-06	UP	5212.95	2402.02	1.1179	0.00035571	0.0046585	UP	5509.36	796.296	2.7905	1.6879e-11	1.7966e-09	UP	GO:0008150//GO:0008152	biological_process//metabolic process	--	--	GO:0016747//GO:0016740//GO:0003824//GO:0016746//GO:0003674	transferase activity, transferring acyl groups other than amino-acyl groups//transferase activity//catalytic activity//transferase activity, transferring acyl groups//molecular_function	K00626 acetyl-CoA C-acetyltransferase [EC:2.3.1.9] | (RefSeq) acetyl-CoA acetyltransferase, cytosolic 1-like	http://www.genome.jp/dbget-bin/www_bget?sot:102600847	-	Thiolase, conserved site||Thiolase, C-terminal||Thiolase, N-terminal||Thiolase||Thiolase-like||Thiolase, active site
Code	PGSC0003DMG401020784	150.58	38.9015	1.9526	4.9601e-05	0.00058783	UP	315.61	145.691	1.1152	0.0040784	0.034164	UP	333.109	40.8256	3.0284	6.0859e-13	8.836e-11	UP	GO:0010467//GO:0006807//GO:0009058//GO:0044238//GO:0046483//GO:0090304//GO:0016070//GO:0034641//GO:0032774//GO:0010468//GO:0065007//GO:0050794//GO:0018130//GO:0060255//GO:0010556//GO:0034654//GO:0019219//GO:0009059//GO:0043170//GO:0019222//GO:1901360//GO:0006139//GO:0044271//GO:0044237//GO:0009987//GO:0051171//GO:0080090//GO:1901362//GO:0009889//GO:0050789//GO:0044249//GO:0031323//GO:0008150//GO:…	gene expression//nitrogen compound metabolic process//biosynthetic process//primary metabolic process//heterocycle metabolic process//nucleic acid metabolic process//RNA metabolic process//cellular nitrogen compound metabolic process//RNA biosynthetic process//regulation of gene expression//biological regulation//regulation of cellular process//heterocycle biosynthetic process//regulation of macr…	--	--	GO:0003674//GO:0003700	molecular_function//DNA-binding transcription factor activity	K16241 transcription factor HY5 | (RefSeq) transcription factor HY5	http://www.genome.jp/dbget-bin/www_bget?sot:102588526	HY5	Basic-leucine zipper domain
